1 **System-level effects of CO<sub>2</sub> and RuBisCO concentration on carbon**  
2 **isotope fractionation**

3

4 Amanda K. Garcia<sup>1‡</sup>, Mateusz Kedzior<sup>1‡</sup>, Arnaud Taton<sup>2</sup>, Meng Li<sup>3</sup>, Jodi N. Young<sup>3</sup> and Betül  
5 Kaçar<sup>1,4\*</sup>

6

7 <sup>1</sup>Department of Molecular and Cellular Biology, University of Arizona, Tucson, AZ

8 <sup>2</sup>Division of Biological Sciences, University of California San Diego, La Jolla, CA

9 <sup>3</sup>School of Oceanography, University of Washington, Seattle, WA

10 <sup>4</sup>Lunar and Planetary Laboratory, Department of Planetary Sciences, University of Arizona,  
11 Tucson, AZ

12

13 ‡These authors contributed equally to this work.

14 \*For correspondence: [betul@arizona.edu](mailto:betul@arizona.edu)

15

16 **KEYWORDS**

17 carbon fixation, carbon isotope fractionation, RuBisCO, biosignatures, cyanobacteria

18

19 **ABSTRACT**

20 Carbon isotope biosignatures preserved in the Precambrian geologic record are primarily  
21 interpreted to reflect ancient cyanobacterial carbon fixation catalyzed by Form I RuBisCO  
22 enzymes. The average range of isotopic biosignatures generally follows that produced by extant  
23 cyanobacteria. However, this observation is difficult to reconcile with several environmental (e.g.,  
24 temperature, pH, and CO<sub>2</sub> concentrations), molecular and physiological factors that likely would  
25 have differed during the Precambrian and can produce fractionation variability in contemporary  
26 organisms that meets or exceeds that observed in the geologic record. To test a range of genetic  
27 and environmental factors that may have impacted ancient carbon isotope biosignatures, we  
28 engineered a mutant strain of the model cyanobacterium *Synechococcus elongatus* PCC 7942 that  
29 overexpresses RuBisCO and characterized the resultant physiological and isotope fractionation  
30 effects. We specifically investigated how both increased atmospheric CO<sub>2</sub> concentrations and  
31 RuBisCO regulation influence cell growth, oxygen evolution rate, and carbon isotope fractionation  
32 in cyanobacteria. We found that >2% CO<sub>2</sub> increases the growth rate of wild-type and mutant  
33 strains, and that the pool of active RuBisCO enzyme increases with increased expression. At  
34 elevated CO<sub>2</sub>, carbon isotope discrimination ( $\epsilon_p$ ) is increased by ~8‰, whereas RuBisCO  
35 overexpression does not significantly affect isotopic discrimination at all tested CO<sub>2</sub>  
36 concentrations. Our results show that understanding the environmental factors that impact  
37 RuBisCO regulation, physiology, and evolution is crucial for reconciling microbially driven  
38 carbon isotope fractionation with the geologic record of organic and inorganic carbon isotope  
39 signatures.

40

41

42 **IMPORTANCE**

43 Carbon isotope biosignatures preserved in the geologic record are interpreted to reflect the long-  
44 term evolution of microbial carbon fixation and provide the earliest evidence of life on Earth.  
45 RuBisCO enzymes, distinctive and early-evolved catalysts that fix atmospheric CO<sub>2</sub>, have likely  
46 been responsible for the bulk of primary productivity through Earth history. Thus, a comprehensive  
47 understanding of the molecular, physiological, environmental, and evolutionary factors that  
48 influence the isotopic discrimination of cyanobacteria that utilize RuBisCO is essential for the  
49 interpretation of ancient isotopic biosignatures. For example, the vastly different atmospheric CO<sub>2</sub>  
50 levels that characterized the Precambrian may have influenced the expression and regulation of  
51 the ancient RuBisCO protein complex. These observations underscore the need to consider how a  
52 broader range of environmental conditions and subcellular processes may have shaped isotopic  
53 discrimination over geologic time. In this study, we establish a cyanobacterial metabolic-  
54 engineering strategy that can test such hypotheses and offer insights into the biogeochemical  
55 record of life.

56

## 57 INTRODUCTION

58 The conserved microbial metabolic pathways that drive global biogeochemistry emerged on Earth  
59 billions of years ago, the evolution of which has both shaped and been shaped by large-scale  
60 environmental transitions (Falkowski, Fenchel, & Delong, 2008; Knoll, Bergmann, & Strauss,  
61 2016; Lyons, Fike, & Zerkle, 2015). These microbial processes have left distinct signatures that  
62 evidence biological activity billions of years in the past. Of these, the oldest and most extensive  
63 signature of biological activity on Earth is the deviation in stable carbon isotopic compositions  
64 ( $^{13}\text{C}/^{12}\text{C}$ , expressed as  $\delta^{13}\text{C}$ ) between preserved inorganic and organic carbon, interpreted to reflect  
65 the isotopic discrimination of ancient biological carbon fixation (Des Marais, 2001; Krissansen-  
66 Totton, Buick, & Catling, 2015; Lloyd et al., 2020; Schidlowski, 2001). These deviations are  
67 primarily shaped by enzymes that preferentially assimilate the lighter  $^{12}\text{C}$  isotope from inorganic  
68 carbon sources. Carbon biosignatures preserved in the geologic record therefore reflect the long-  
69 term evolution of these enzyme-mediated processes and their hosts' physiologies.

70  
71 The RuBisCO enzyme (ribulose 1,5-bisphosphate (RuBP) carboxylase/oxygenase) catalyzes the  
72 reduction of inorganic  $\text{CO}_2$  as the initial step of carbon assimilation into organic biomass via the  
73 Calvin-Benson-Bassham (CBB) cycle (Erb & Zarzycki, 2018; Nisbet et al., 2007; Tcherkez,  
74 Farquhar, & Andrews, 2006). RuBisCO is one of the most abundant proteins on Earth (Bar-On &  
75 Milo, 2019; Ellis, 1979; Raven, 2013), and its presence in photoautotrophic organisms, including  
76 early-evolved cyanobacteria, suggests that this enzyme has played a significant role in primary  
77 production for much of Earth history (Hamilton, Bryant, & Macalady, 2016; Schirrmeister,  
78 Sanchez-Baracaldo, & Wacey, 2016; Schopf, 2011). Thus, the isotopic fractionation behavior of  
79 RuBisCO is also thought to have primarily constrained Precambrian carbon isotope signatures

80 preserved in the geologic record (Garcia, Cavanaugh, & Kacar, 2021; Schidlowski, 1988). Though  
81 there exist multiple forms of RuBisCO, the known range of Form I RuBisCO isotopic fraction ( $\epsilon$   
82  $\approx 20\text{-}30\text{‰}$ ) (R. D. Guy, Fogel, & Berry, 1993; Scott et al., 2007; von Caemmerer, Tazoe, Evans,  
83 & Whitney, 2014) — the form utilized by extant cyanobacteria and responsible for the bulk of  
84 modern primary production (Field, 1998) — is largely consistent with the  $\sim 25\text{‰}$  mean deviation  
85 between preserved inorganic and organic carbon isotopic compositions across geologic time (Des  
86 Marais, 2001; Garcia et al., 2021; Havig, Hamilton, Bachan, & Kump, 2017; Krissansen-Totton et  
87 al., 2015; Lloyd et al., 2020; Schidlowski, 2001).

88  
89 RuBisCO primarily shapes the generation of distinct carbon isotopic biosignatures associated with  
90 CBB-utilizing organisms. Nonetheless the carbon isotopic composition of bulk photoautotrophic  
91 biomass often deviates from values obtained for purified RuBisCO. This discrepancy might be  
92 attributable to several intracellular physiological and metabolic features that additionally shift the  
93 isotopic composition of organism biomass. These include the activation of carbon-concentrating  
94 mechanisms such as the partitioning of RuBisCO into carboxysomes (Hurley, Wing, Jasper, Hill,  
95 & Cameron, 2021; Laws, Popp, Cassar, & Tanimoto, 2002; Price, Badger, Woodger, & Long,  
96 2008; Raven, Cockell, & De La Rocha, 2008), the diffusive transport of  $\text{CO}_2$  (Hayes, 1993; Rau,  
97 Riebesell, & Wolf-Gladrow, 1996), and intermediary carbon-fixing steps (Eungrasamee, Miao,  
98 Incharoensakdi, Lindblad, & Jantaro, 2019; H. I. Guy & Evans, 1996; Hayes, 1993; Rothschild &  
99 DesMarais, 1989). Further, studies show that photosynthetic carbon isotope discrimination ( $\epsilon_p$ )  
100 may vary due to environmental factors and cellular physiological responses, including temperature  
101 (Deleens, Treichel, & O'Leary, 1985; Wong & Sackett, 1978), pH (Hinga, Arthur, Pilson, &  
102 Whitaker, 1994; Roeske & O'Leary, 1984), growth rate (Bidigare et al., 1997; Laws, Bidigare, &

103 Popp, 1997), and CO<sub>2</sub> concentration (Eichner, Thoms, Kranz, & Rost, 2015; Freeman & Hayes,  
104 1992; Hinga et al., 1994; Hurley et al., 2021; Schubert & Jahren, 2012; Wilkes, Lee, McClelland,  
105 Rickaby, & Pearson, 2018). These variations indicate a compelling need to comprehensively  
106 characterize both internal and external factors that can affect isotope fractionation, though the  
107 study of each tend to be siloed in biological and geobiological fields, respectively.

108  
109 An aspect of photoautotrophic isotopic discrimination that has not been thoroughly investigated is  
110 how variable RuBisCO expression can influence host organism growth parameters and the isotopic  
111 composition of assimilated biomass. RuBisCO expression has been shown to be CO<sub>2</sub>-sensitive  
112 (Gesch et al., 2003; Onizuka et al., 2002; Sengupta, Sunder, Sohoni, & Wangikar, 2019). This  
113 observation is particularly important, considering that atmospheric CO<sub>2</sub> concentrations exceeded  
114 present day levels by more than an order of magnitude for much of Earth history (between ~0.001  
115 and 0.1 bar CO<sub>2</sub> through the Precambrian (Catling & Zahnle, 2020)) and that the RuBisCO  
116 catalytic efficiency itself is sensitive to the atmospheric CO<sub>2</sub>/O<sub>2</sub> levels (Erb & Zarzycki, 2018;  
117 Kacar, Hanson-Smith, Adam, & Boekelheide, 2017; Poudel et al., 2020; Riebesell, Revill,  
118 Holdsworth, & Volkman, 2000; Schubert & Jahren, 2012; Scott et al., 2007; Tcherkez et al., 2006;  
119 Wilkes et al., 2018). Thus, interpretation of the carbon isotope record should take into account the  
120 coupled influence of CO<sub>2</sub> concentration and RuBisCO expression in generating isotopic  
121 biosignatures and shaping ancient primary productivity.

122  
123 To investigate the interplay between RuBisCO expression and CO<sub>2</sub> concentrations on  
124 cyanobacterial fitness and carbon isotopic discrimination, we generated a genetic system to  
125 manipulate the expression levels of RuBisCO in the model organism *Synechococcus elongatus*

126 PCC 7942 (hereafter *S. elongatus*). *S. elongatus* is a naturally competent obligate photoautotroph  
127 that utilizes Form I RuBisCO to fix carbon (Bonfil et al., 1998; Gabay, Lieman-Hurwitz, Hassidim,  
128 Ronen-Tarazi, & Kaplan, 1998; Maeda, Price, Badger, Enomoto, & Omata, 2000; Omata, Gohta,  
129 Takahashi, Harano, & Maeda, 2001; Taton et al., 2020; Tchernov et al., 2001). Specifically, we  
130 engineered the *S. elongatus* genome with an additional copy of the RuBisCO operon in a  
131 chromosomal neutral site to overexpress RuBisCO and permit genetic manipulation of the  
132 RuBisCO operon for future studies. We confirmed proper assembly of the overexpressed RuBisCO  
133 complex and its catalytic activity in the engineered strain. Then, to assess whether physiological  
134 and subcellular parameters and varying CO<sub>2</sub> concentrations modulate carbon isotopic  
135 discrimination in cyanobacteria, we determined growth rate, photosynthetic oxygen evolution rate,  
136 and <sup>13</sup>C/<sup>12</sup>C discrimination of the engineered strain in comparison to wild-type *S. elongatus*. Our  
137 results suggest that increased CO<sub>2</sub> concentrations result in significantly faster growth in  
138 cyanobacteria and increase the magnitude of isotopic discrimination. On the other hand, we show  
139 that changing cellular RuBisCO levels do not significantly alter carbon isotope discrimination.

140

## 141 **RESULTS**

### 142 **A second copy of the *rbc* operon results in increased amount of active RuBisCO**

143 The RuBisCO Form I enzyme in *S. elongatus* is encoded by an operon that includes a CO<sub>2</sub>-  
144 sensitive promoter region (Sengupta et al., 2019) as well as the structural *rbcL* (large subunit) and  
145 *rbcS* (small subunit) genes (Vijayan, Jain, & O'Shea, 2011). We designed *S. elongatus* strain Syn02  
146 that harbors the native *rbc* operon and a second copy inserted in the chromosome neutral site 2  
147 (NS2), a site that permits genetic modification without additional indirect phenotypic impact  
148 (Andersson et al., 2000; Clerico, Ditty, & Golden, 2007) (**Fig. 1**). Syn02 was constructed by

149 transforming wild-type (WT) *S. elongatus* with plasmid pSyn02 carrying the *rbc* operon and  
150 homologous regions directing recombination at NS2 (**Table 1**). Additionally, we generated a  
151 control strain Syn01 whereby RuBisCO is provided solely by an engineered *rbc* operon at its NS2  
152 site.

153  
154 We evaluated whether the additional copy of the *rbc* operon in strain Syn02 resulted in RuBisCO  
155 overexpression by quantifying transcription of the *rbcL* and *purK* (located downstream of *rbcL* in  
156 the operon) genes by quantitative reverse-transcription PCR (RT-qPCR). Transcripts were  
157 quantified and normalized to those of *secA* and *ppc* reference genes (Hood, Higgins, Flamholz,  
158 Nichols, & Savage, 2016; Luo et al., 2019; Szekeres, Sicora, Dragoş, & Drugă, 2014). We found  
159 that the level of *rbcL* transcript in Syn02 increased by at least 2-fold relative to WT across all  
160 tested CO<sub>2</sub> concentrations and growth phases, and as high as ~14-fold in air ( $p < 0.01$ ; **Fig. 2A**,  
161 **Fig. S1A**). In addition, we found that *rbcL* expression increased by >5-fold at elevated CO<sub>2</sub>  
162 concentrations relative to ambient air ( $p < 0.001$ ; **Fig. 2B**, **Fig. S1B**). Expression of *purK* in Syn02  
163 increased by >2-fold at 2% and 5% CO<sub>2</sub> relative to WT, but decreased by ~0.5-fold in air (**Fig.**  
164 **S1C**).

165  
166 To determine *rbcL* overexpression at the protein-level, we quantified RbcL protein from crude cell  
167 lysates by Western blot using rabbit anti-RbcL antibody (see **Materials and Methods**). In  
168 agreement with RuBisCO overexpression indicated by the RT-qPCR results, densitometric  
169 analyses revealed a mean ~2 to 4-fold increase of RbcL protein in Syn02 relative to WT across all  
170 tested CO<sub>2</sub> concentrations ( $p < 0.01$ ; **Fig. 2C**). Finally, we confirmed proper assembly of the large  
171 (L) and small (S) subunits into the RuBisCO L<sub>8</sub>S<sub>8</sub> complex in Syn02 as well as the Syn01 control



172 strain by native protein electrophoresis and detection by anti-RbcL antibody. We found a ~3-fold  
173 increase in assembled RuBisCO protein for Syn02 and ~2-fold increase for Syn01 relative to WT  
174 for cultures grown in 2% CO<sub>2</sub> (**Fig. 2D**).

175  
176 Finally, we tested whether or not RuBisCO overexpression in Syn02 resulted in an increased  
177 amount of active RuBisCO by determining the total carboxylase activity of cell lysates. Enzyme  
178 activity was evaluated by an *in vitro* spectrophotometric coupled-enzyme assay that links  
179 carboxylase activity to NADH oxidation, reported as the RuBP consumption rate normalized to  
180 total soluble protein content (Kubien, Brown, & Kane, 2011). We measured a mean ~0.8-fold ( $p$   
181  $< 0.01$ ) increase in Syn02 lysate RuBisCO activity relative to WT (**Fig. 2E**). No significant  
182 difference in activity was detected between Syn01 and WT cultures.

183  
184 **RuBisCO overexpression does not strongly influence growth rate or photosynthetic activity**

185 We cultured WT and Syn02 *S. elongatus* strains in order to determine the influence of Syn02  
186 RuBisCO overexpression on growth rate. Cultures were continuously sparged with ambient air, as  
187 well as 2% and 5% CO<sub>2</sub>, with daily optical density measurements at 750 nm (OD<sub>750</sub>) as described  
188 in **Materials and Methods**. WT and Syn02 both exhibited ~2.5-fold faster growth rates under 2%  
189 and 5% CO<sub>2</sub> compared to ambient air ( $p < 0.001$ ; **Fig. 2A**; **Table 2**). Syn02 exhibited a slight  
190 ~0.1-fold increase in growth rate in ambient air relative to WT ( $p < 0.05$ ). No difference in growth  
191 rate was observed between the two strains under 2% and 5% CO<sub>2</sub>. The carrying capacity  
192 (maximum cell density measured at OD<sub>750</sub> across the total growth period) for cultures varied  
193 between different atmospheric conditions, with a maximum carrying capacity of OD<sub>750</sub>  $\approx 8.4$   
194 reached under 2% CO<sub>2</sub>. No significant difference in carrying capacity was found between WT and

195 Syn02 cultures grown under the same atmospheric conditions. To determine the degree to which  
196 sparging impacted growth, we repeated the growth experiments without sparging. Minimal  
197 differences were again observed between WT and Syn02 across different CO<sub>2</sub> concentrations  
198 **(Table S1)**.

199  
200 To further test for differences in photosynthetic activities between the WT and Syn02 strains, we  
201 measured their oxygen evolution rates. After brief incubation in the dark, culture samples were  
202 exposed to saturated light in an oxygen electrode chamber to detect increased levels of molecular  
203 oxygen. Oxygen evolution rates were normalized to chlorophyll *a* concentrations, following  
204 Zavrel et al. (Zavrel, Sinetova, & Červený, 2015). We did not observe a significant difference in  
205 mean oxygen evolution rate between WT and Syn02 ( $342 \pm 26 \text{ O}_2 \cdot \text{h}^{-1} \cdot \mu\text{g}^{-1}$  chlorophyll *a* and  $362$   
206  $\pm 26 \text{ O}_2 \cdot \text{h}^{-1} \cdot \mu\text{g}^{-1}$  chlorophyll *a*, respectively) **(Table 2)**.

207  
208 **CO<sub>2</sub> concentration impacts *S. elongatus* <sup>13</sup>C/<sup>12</sup>C fractionation**

209 We tested both the influence of RuBisCO overexpression and CO<sub>2</sub> concentration on the magnitude  
210 of <sup>13</sup>C/<sup>12</sup>C isotopic discrimination in *S. elongatus*, which was assessed by measuring the <sup>13</sup>C/<sup>12</sup>C  
211 composition of biomass ( $\delta^{13}\text{C}_{\text{biomass}}$ ). The isotopic discrimination associated with photosynthetic  
212 CO<sub>2</sub> fixation ( $\epsilon_p$ ) was then calculated from measured  $\delta^{13}\text{C}_{\text{biomass}}$  and a reference  $\delta^{13}\text{C}_{\text{CO}_2}$  value (8.4  
213 ‰; (Keeling et al., 2017)), as described in **Materials and Methods**. We observed that increased  
214 CO<sub>2</sub> concentration increases the magnitude of *S. elongatus* <sup>13</sup>C/<sup>12</sup>C discrimination. Mean  $\epsilon_p$  values  
215 for *S. elongatus* strains grown in ambient air were ~10‰ **(Fig. 4A)**. At 2% and 5% CO<sub>2</sub>,  $\epsilon_p$  values  
216 were ~7-9‰ greater than those for cultures grown in air, with mean values ranging between ~17‰  
217 to 20‰ ( $p < 0.001$ ). Mean  $\epsilon_p$  values were similar for WT and Syn02 strains most tested CO<sub>2</sub>

218 conditions, with the exception of 5% CO<sub>2</sub>, where a significant but slight difference in  $\epsilon_p$  values  
219 was detected (18.95‰ and 18.62‰ for WT and Syn02, respectively;  $p < 0.01$ ). These results  
220 demonstrate that RuBisCO overexpression in Syn02 does not strongly impact cyanobacterial  
221 <sup>13</sup>C/<sup>12</sup>C discrimination.

222

## 223 **DISCUSSION**

224 In this study, we developed an integrative approach to investigate the coupled impact of CO<sub>2</sub> levels  
225 and RuBisCO expression on cyanobacterial growth, fitness and carbon isotope discrimination. We  
226 tested whether the overexpression of RuBisCO influences *S. elongatus* growth, physiology and  
227 carbon isotope fractionation at different CO<sub>2</sub> atmosphere concentrations by generating an  
228 engineered *S. elongatus* strain Syn02 that harbors a second copy of the *rbc* operon at NS2.

229

230 Our transcriptional analyses indicate that *S. elongatus* strain Syn02 overexpresses RuBisCO  
231 relative to WT at all tested CO<sub>2</sub> concentrations (ambient air, 2%, and 5% CO<sub>2</sub>) (**Fig. 2A, Fig. 2C**).  
232 In addition, we found that *rbcL* transcript levels increase for all strains at elevated CO<sub>2</sub> levels  
233 relative to air (**Fig. 2B**). This result is in agreement with a previous study reporting a regulatory  
234 element in the *S. elongatus* PCC 7942 *rbcL* operon that regulates the expression of RbcL with  
235 increasing CO<sub>2</sub> (Sengupta et al., 2019). We found that the magnitude of increased *rbcL*  
236 transcription between Syn02 and WT was lower at elevated CO<sub>2</sub> (**Fig. 2A**). For example, in air,  
237 *rbcL* transcript levels in Syn02 were ~14-fold greater than in WT, but in 2% CO<sub>2</sub>, only a ~2-fold  
238 increase was observed. These results indicate that, whereas RuBisCO expression is impacted by  
239 CO<sub>2</sub> concentration, other physiological factors such as the translation efficiency or expression of

240 other ancillary crucial proteins may ~~may~~ be limiting RuBisCO expression and dampen the effects  
241 of an additional copy of the *rbc* operon in Syn02.

242

243 Protein-level analyses indicate that increased *rbc* transcription in Syn02 relative to WT does result  
244 in increased cellular RuBisCO concentration. The magnitude of this increase is relatively constant  
245 (~2-3 fold) across different CO<sub>2</sub> concentrations (**Fig. 2C**). These results are supported by a ~2-fold  
246 increase in assembled RuBisCO L<sub>8</sub>S<sub>8</sub> protein in Syn02 relative to WT (**Fig. 3A**). However, the  
247 ~0.8-fold increase in carboxylase activity of Syn02 cell lysate relative to that of WT was not  
248 directly proportional to the increase in protein amount observed by Western blot analyses,  
249 suggesting that not all overexpressed RuBisCO was catalytically active (**Fig. 3B**). Previous studies  
250 showed overexpression of RuBisCO in cyanobacteria generally produces an increased pool of  
251 active carboxylase (Atsumi, Higashide, & Liao, 2009; Iwaki et al., 2006; Lechno-Yossef et al.,  
252 2020; Liang & Lindblad, 2017). However, it is possible that not all overexpressed RuBisCO may  
253 be properly assembled, e.g., due to limited chaperonin GroEL/ES, which is known to be involved  
254 in RuBisCO folding (Hayer-Hartl, 2017; Liu et al., 2010). Altogether, our findings suggest that  
255 additional physiological constraints may be limiting RuBisCO expression beyond transcription.  
256 The exact mechanism of the regulation we observed in our experiments await further  
257 characterization.

258

259 Various culture conditions including pH, temperature, CO<sub>2</sub> concentration, and light intensity may  
260 substantially affect the growth characteristics of cyanobacteria, and thus have the potential to  
261 influence isotopic discrimination (Kuan, Duff, Posarac, & Bi, 2015; Rillema, MacCready, &  
262 Vecchiarelli, 2020; Ungerer, Lin, Chen, & Pakrasi, 2018; Yu et al., 2015). The influence of genetic

263 factors, including the regulation of RuBisCO expression on cyanobacterial fitness, is less well  
264 known. Previous studies targeting the correlation between RuBisCO overexpression and fitness in  
265 cyanobacteria have yielded mixed results. For instance, faster growth rates and oxygen evolution  
266 rates were observed for an engineered *Synechocystis* PCC 6803 strain that overexpresses RuBisCO  
267 (Liang & Lindblad, 2017), as well as in *S. elongatus* upon co-overexpression of its  
268 phosphoribulokinase (Kanno, Carroll, & Atsumi, 2017). However, in *Synechococcus* sp. PCC  
269 7002, the overexpression of RuBisCO did not alter growth rate (De Porcellinis et al., 2018). The  
270 impact of RuBisCO upregulation on cyanobacterial growth appears to be species/strain-specific.  
271 Our data shows that RuBisCO overexpression in *S. elongatus* PCC 7942 strain Syn02 results in a  
272 minor increase in growth rate in ambient air relative to WT, and no significant difference was  
273 observed at elevated CO<sub>2</sub> levels, nor for oxygen evolution rates. Under ambient environmental  
274 conditions, RuBisCO has a relatively high baseline level of expression in cyanobacteria (V.  
275 Vijayan, I. H. Jain, & E. K. O'Shea, 2011), perhaps explaining why increased expression does not  
276 significantly improve fitness. Our results indicate that further study is needed to fully understand  
277 the coupled interaction of different environmental conditions and genetic backgrounds in  
278 determining cyanobacterial fitness.

279  
280 Another important aspect to consider is the degree to which genetic regulation and background  
281 may impact system-level isotope fractionation in cyanobacteria. Understanding the connection  
282 between genetics and biogeochemistry, though often overlooked, can augment interpretation of  
283 isotopic biosignatures in deep time. We measured the carbon isotopic composition of  
284 cyanobacterial biomass ( $\delta^{13}\text{C}_{\text{biomass}}$ ) and photosynthetic carbon isotopic discrimination ( $\epsilon_p$ ) in WT  
285 and Syn02 cultured under a range of CO<sub>2</sub> concentrations. The increased expression and activity of

286 RuBisCO in Syn02 apparently neither changed the availability of carbon isotopes in the enzyme's  
287 vicinity nor altered the performance of other cellular modules contributing to carbon isotope  
288 discrimination.  $\delta^{13}\text{C}_{\text{biomass}}$  and  $\epsilon_p$  values were comparable for WT and Syn02 grown at all tested  
289  $\text{CO}_2$  concentrations (**Fig. 4**).

290  
291 Our results show that at both 2% and 5%  $\text{CO}_2$ ,  $\epsilon_p$  values were increased by ~7-9‰ for WT and  
292 Syn02 strains relative to air. Theoretically, under high  $\text{CO}_2$  concentrations, the intrinsic kinetic  
293 isotope effect of RuBisCO is expressed and maximizes  $\epsilon_p$  (Bidigare et al., 1997; Hayes, 1993;  
294 Schubert & Jahren, 2012; Wilkes et al., 2018). Under these conditions, other cellular modules,  
295 such as carbon concentrating mechanisms capable of discriminating carbon isotopes, produce  
296 negligible impact on net carbon discrimination at the organismal level (Hurley et al., 2021; Laws  
297 et al., 2002). The positive relationship between  $\text{CO}_2$  concentration and carbon isotope fractionation  
298 has been observed empirically for a variety of autotrophs (Freeman & Hayes, 1992; Hinga et al.,  
299 1994; Schubert & Jahren, 2012; Wilkes et al., 2018), including for cyanobacteria in particular  
300 (Eichner et al., 2015; Hurley et al., 2021). Other studies showed that photoautotrophs that grew  
301 under a lower pH, and thus a higher proportion of  $\text{CO}_2$ , also exhibited higher carbon fractionation  
302 (Mizutani & Wada, 1982; Roeske & O'Leary, 1984; Wang, Yeager, & Lu, 2016; Yoshioka, 1997).  
303 The  $\epsilon_p$  values observed under high inorganic carbon availability fall within the range of 17-20‰  
304 (**Fig. 4B**), which follows the range known for Form I RuBisCO (R. D. Guy et al., 1993; McNevin,  
305 Badger, Kane, & Farquhar, 2006; Scott et al., 2007).

306  
307 Based on the data generated here, we speculate that, in addition to environmental factors such as  
308  $\text{CO}_2$  concentrations, RuBisCO variation at the gene and enzymatic level, rather than its

309 overexpression and regulation, may be a more significant determinant of the isotopic composition  
310 of produced biosignatures. Less well-characterized RuBisCO forms (i.e., Forms IC, ID, and II)  
311 that are found in proteobacteria and marine phytoplankton can exhibit significantly smaller  
312 fractionation factors than that observed for forms associated with land plants and cyanobacteria  
313 (Boller, Thomas, Cavanaugh, & Scott, 2011; Robinson et al., 2003; Thomas et al., 2019). The full  
314 diversity of RuBisCO isotopic fractionation requires further study<sup>7</sup>. Our results underscore that the  
315 integration of synthetic biology, metabolic engineering and geochemistry can offer new insights  
316 into the study and interpretation of biogeochemical reservoirs at the global scale. Further work  
317 needs to be performed to elucidate how the intracellular factors impact metabolisms responsible  
318 for carbon isotope fractionation under ancient transitions in environmental conditions. A deeper  
319 understanding of the impact of the RuBisCO regulation and the environmental factors on the  
320 resulting organismal behavior is essential to establish the extent to which the RuBisCO isotope  
321 fractionation properties can be correlated with evidence for biological activity in the Earth's deep  
322 past.

323

## 324 **ACKNOWLEDGEMENTS**

325 This work was supported by the National Science Foundation Emerging Frontiers Program Award  
326 No. 1724090 (BK), NASA Early Career Faculty (ECF) Award No. 80NSSC19K1617 (BK.),  
327 NASA Postdoctoral Fellowship (AKG.), Simons Foundation Early Career Award No. 561645  
328 (JNY and ML), and National Institute of General Medical Sciences of the National Institutes of  
329 Health award number R01GM118815 (AT, to James W. Golden at the University of California-  
330 San Diego). We sincerely thank Bob Blankenship, Zach Adam, Katie McGrath and the members

331 of the Kaçar Lab for their thoughtful comments and suggestions; Sky Dominguez and the  
332 University of California-Davis Stable Isotope Facility for the assistance.

333

## 334 **MATERIALS AND METHODS**

### 335 **Cyanobacterial growth and maintenance**

336 *S. elongatus* PCC 7942 strains were cultured in BG-11 medium (Rippka, Deruelles, Waterbury,  
337 Herdman, & Stanier, 1979) as liquid cultures or on agar plates (1.5% (w/v) agar and 1 mM  
338  $\text{Na}_2\text{S}_2\text{O}_3 \cdot 5\text{H}_2\text{O}$ ). For recombinant strains, liquid and solid media were supplemented with  
339 appropriate antibiotics: 2  $\mu\text{g} \cdot \text{ml}^{-1}$  Spectinomycin (Sp) plus 2  $\mu\text{g} \cdot \text{ml}^{-1}$  Streptomycin (Sm), 5  
340  $\mu\text{g} \cdot \text{ml}^{-1}$  Kanamycin (Km). The cyanobacterial growth was measured at optical density at 750 nm  
341 ( $\text{OD}_{750}$ ).

342

343 The strains were archived at  $-80\text{ }^\circ\text{C}$  in 15% (v/v) glycerol. The 2-ml vials were rapidly thawed and  
344 inoculated in liquid BG-11 (supplemented with antibiotics as needed). Cultures were shaken at  
345 120 rpm at  $30\text{ }^\circ\text{C}$  under continuous low illumination of  $45\text{ }\mu\text{mol photon} \cdot \text{m}^{-2} \cdot \text{s}^{-1}$ , and ambient air,  
346 until they reached an  $\text{OD}_{750}$  between 0.4 and 0.6. These cultures were then used to inoculate fresh  
347 cultures that were grown using similar conditions but under moderate illumination of  $80\text{ }\mu\text{mol}$   
348  $\text{photon} \cdot \text{m}^{-2} \cdot \text{s}^{-1}$  and sparged at selected  $\text{CO}_2$  concentrations (ambient air, 2%, or 5%  $\text{CO}_2$ ; cultures  
349 were also grown without sparging to assess differences in growth rate; **Table S1**). When cultures  
350 reached an  $\text{OD}_{750}$  of  $\sim 7$  to 7.5, they were sampled for subsequent experiments as described below  
351 (cultures were also sampled at an earlier  $\text{OD}_{750}$  of 0.5-1.5 for additional RT-qPCR experiments,  
352 see below; **Fig. S1**).

353



## 354 **Genetic engineering of cyanobacteria**

355 A recombinant strains of *S. elongatus* was constructed by natural transformation using standard  
356 protocols (Clerico et al., 2007) and the plasmids and methods described below (**Table 1**) . To  
357 construct the plasmid pSyn02, pAM4937 was digested with *Swa*I to release the *ccdB* toxic gene  
358 and produce a plasmid backbone that contains the pBR322 *E. coli* origin of replication, the base  
359 of mobilization site for conjugal transfer, the *aph*I gene conferring kanamycin resistance, and  
360 sequences for homologous recombination into *S. elongatus* chromosome at NS2. The *rbc* operon  
361 was amplified from *S. elongatus* PCC 7942 gDNA with primers F01 and R01 (**Table S2**)  
362 containing 20-nucleotide sequences that overlap with pAM4937 backbone. The resulting DNA  
363 fragments were assembled using the GeneArt™ Seamless Cloning and Assembly Kit (Invitrogen,  
364 Cat. No. A13288). pSyn02 was used to insert the *rbc* operon into NS2 of the wild type genome in  
365 the strain PCC 7942 through homologous recombination to create the strain of *S. elongatus*, Syn02,  
366 carrying two copies of the *rbc* operon. Plasmid pSyn-01 was constructed by using two primer pairs  
367 F02/R02 and F03/R03 (**Table S2**), 1) to amplify a fragment of pAM4951 that contains the *E. coli*  
368 origin of replication and the site for conjugal transfer, and 2) to amplify the *aadA* gene conferring  
369 spectinomycin/streptomycin resistance. Native *rbc* operon flanking sequences were amplified  
370 from the *S. elongatus* PCC 7942 gDNA with the primer pairs F04/R04 and F05/R05 (**Table S2**)  
371 containing 20-nucleotide sequences that overlap with the pAM4951 fragments.

372  
373 Transformation was carried out after growing the WT strain in liquid culture at 30 °C with shaking  
374 (120 rpm) and a light intensity of 80  $\mu\text{mol photon}\cdot\text{m}^{-2}\cdot\text{s}^{-1}$  until an  $\text{OD}_{750} \sim 0.7$ . The cells were  
375 prepared for transformation according to the protocol by Clerico et al. (2007) and plated on BG-  
376 11 agar containing the appropriate antibiotic(s) for recovery. Subsequently, the colonies were

377 picked using sterile pipette tips, patched onto BG-11 agar containing the appropriate antibiotic(s),  
378 and further incubated to ensure complete chromosome segregation (i.e., incorporation of the *trans*-  
379 gene into all chromosomes). The patched transformants were screened using colony PCR using  
380 the primers F06/R06 and F07/R07 and the genotypes of the engineered strains were confirmed by  
381 Sanger sequencing using the primers F08/R08 (**Fig. S2, Table S2**)

382

### 383 **Extraction of total RNA and proteins**

384 Cultures were collected during the exponential growth phase. Cells were pelleted by centrifugation  
385 at  $4,700 \times g$  for 10 min at room temperature and resuspended in 10 mL of TE buffer (10 mM Tris,  
386 pH 8.0, 1 mM EDTA). To prepare the crude cell lysate, 8 mL of the cell suspension were pelleted  
387 by centrifugation at  $4,700 \times g$  for 10 min at room temperature, resuspended in 500  $\mu$ L of hot (pre-  
388 warmed to 95 °C) TE buffer supplemented with 1% (w/v) SDS and incubated at 95 °C for 10 min.  
389 Then, the mixture was sonicated at 40% amplitude for  $3 \times 10$  sec with 10 sec intervals, and the  
390 cell debris centrifuged at  $17,000 \times g$  for 10 min at room temperature. The supernatant was collected  
391 and stored at -80 °C. Total RNA was extracted from the remaining 2 mL of the cell suspension  
392 using the RNeasy® Protect Bacteria Mini Kit (QIAGEN, Cat. No. 74524) following the  
393 manufacturer instructions.

394

### 395 **Analysis of *rbc* operon expression by RT-qPCR**

396 Total RNA was quantified with the NanoDrop spectrophotometer and 1  $\mu$ g of RNA was treated  
397 with the amplification grade deoxyribonuclease I (Invitrogen, Cat. No. 18068-015). 10  $\mu$ L of  
398 DNase I-treated RNA was then used in reverse transcription (RT) performed with the  
399 SuperScript™ IV First-Strand Synthesis System (Invitrogen, Cat. No. 18091050). The four pairs

400 of qPCR primers (listed in **Table S2**) were designed with Primer3Plus  
401 (<http://www.bioinformatics.nl/cgi-bin/primer3plus/primer3plus.cgi>). Both reference genes have  
402 previously been shown to be stably expressed under diverse conditions in *S. elongatus* (Luo et al.,  
403 2019). The quality of cDNA and primer specificity was assessed by PCR using cDNA templates  
404 (RT positive reactions), RT negative controls, and the qPCR primers. The analysis of gene  
405 expression levels was performed in the real-time thermal cycler qTOWER<sup>3</sup> G (Analytik Jena AG),  
406 equipped with the software qPCRsoft, using the cycles: 50 °C/2 min, 95 °C/2 min, 40 × (95 °C/15  
407 sec, 60 °C/1 min). The relative expression of the *rbc* operon genes (*rbcL* and *purK*) was calculated  
408 as the average fold change normalized to reference genes using the delta-delta Ct method. The  
409 experiment was carried out using three biological replicates and three technical replicates.

410

#### 411 **Analysis of RbcL protein by Western blot**

412 Total protein concentration in the crude cell lysates was measured using the Pierce™ BCA Protein  
413 Assay Kit (Thermo Scientific, Cat. No. 23225). The lysates were loaded in the amount of 5 µg of  
414 total protein in Laemmli sample buffer onto a 6% (v/v) polyacrylamide stacking gel. Proteins were  
415 electrophoresed in a 12% polyacrylamide resolving gel in TGS buffer and blotted in transfer buffer  
416 onto a PVDF membrane. Total protein load in each sample was visualized by Revert™ 700 Total  
417 Protein Stain (LI-COR Biosciences, Cat. No. 926-11011) and used for the RbcL signal  
418 normalization. Detection of RbcL was performed by overnight incubation of the membrane at 4  
419 °C with rabbit anti-RbcL antibody (Agrisera, Cat. No. AS03 037), 1:5000 in TBST with 5% non-  
420 fat milk, followed by one-hour incubation at room temperature with IRDye® 800CW goat anti-  
421 rabbit IgG secondary antibody (LI-COR Biosciences, Cat. No. 926-32211), 1:20,000 in Intercept®  
422 (TBS) blocking buffer (LI-COR Biosciences, Cat. No. 927-60001) with 0.1% (v/v) Tween-20 and

423 0.01% (w/v) SDS. Both the total protein load and the amount of RbcL in each sample were  
424 documented with Odyssey® Fc Imaging System (LI-COR Biosciences, Cat. No. 2800-03) at the  
425 near-infrared detection mode. The images were acquired using Image Studio™ software. The  
426 densitometric analysis of RbcL signal intensity, normalized to total protein load, was performed  
427 with Quantity One® software (Bio-Rad) for six biological replicates. The amount of RbcL  
428 produced by each replicate of the Syn02 strain culture was compared to the averaged level of RbcL  
429 in the WT PCC 7942 replicate cultures and expressed as the averaged percent of RbcL synthesized  
430 by the WT strain.

431

#### 432 **Assembly of RuBisCO subunits**

433 Assembly of the RuBisCO large and small subunits into a hexadecameric complex in each strain  
434 was evaluated by native gel electrophoresis and immunodetection of the RuBisCO complexes.  
435 Samples were collected during the exponential growth phase. Cells were pelleted by centrifugation  
436 at  $4,700 \times g$  for 10 min at room temperature and resuspended in 400  $\mu\text{L}$  of native lysis buffer (50  
437 mM Tris, pH 8.0, 150 mM NaCl, 1 mM EDTA, 10% (v/v) glycerol) supplemented with 5 mM  
438 DTT, 100  $\mu\text{g}/\text{mL}$  lysozyme from chicken egg white, and 1% (v/v) Halt™ Protease Inhibitor  
439 Cocktail (Thermo Scientific, Cat. No. 78430). The cell suspensions were incubated at 30 °C for  
440 15 min and subjected to five consecutive freeze-thaw cycles (10 min at -80 °C followed by 5 min  
441 at 30 °C), then were sonicated on ice for 3 minutes at 30% amplitude (2-sec on/off intervals),  
442 centrifuged at  $17,000 \times g$  for 15 min at 4 °C. The concentration of total soluble proteins in the  
443 lysates was determined with Pierce™ BCA Protein Assay Kit. The lysates were adjusted to 5  $\mu\text{g}$   
444 of total soluble proteins in native sample buffer and then loaded onto a 4-20% Mini-PROTEAN®  
445 TGX™ Precast Protein Gel (Bio-Rad, Cat. No. 4561094). Protein electrophoreses were performed

446 in TG buffer (60 mM Tris, 192 mM glycine) at 100 V for 4 h at 4 °C and blotted in transfer buffer  
447 (48 mM Tris, pH 9.2, 39 mM glycine, 0.04% (w/v) SDS) onto a nitrocellulose membrane. After  
448 three 10-min washes in wash buffer (48 mM Tris, pH 9.2, 39 mM glycine, 20% (v/v) methanol),  
449 total protein load in each sample was visualized by Revert™ 700 Total Protein Stain and used for  
450 the normalization of RuBisCO complex quantity. Immunodetection of the RuBisCO complex was  
451 performed with the same primary and secondary antibodies that were used to analyze the level of  
452 RbcL, as described above.

453

#### 454 **Catalytic activity of RuBisCO**

455 The activity of RuBisCO in cyanobacterial lysates was measured using a spectrophotometric  
456 coupled-enzyme assay that links this activity with the rate of NADH oxidation (Kubien et al.,  
457 2011). The cyanobacterial strains were cultured, collected, and pelleted as described above. The  
458 pellets were resuspended in 1 mL of ice-cold lysis buffer (50 mM EPPS, 1 mM EDTA, 2 mM  
459 DTT, pH 8.0) and transferred into 2 mL screw-capped tubes with Lysing Matrix B (MP  
460 Biomedical) for lysis by bead beating using FastPrep-24™ 5G bead beater (MP Biomedical) with  
461 4 m/sec for 10 sec, followed by 2-min incubation on ice, repeated six times. The cell lysates were  
462 transferred to new Eppendorf tubes to remove the beads and unbroken cells and to pellet the  
463 thylakoid membrane by centrifugation at  $10,000 \times g$  for 1 min and at  $20,000 \times g$  for 30 min at 4  
464 °C, sequentially. The resulting clear supernatants containing cytosolic soluble proteins, including  
465 phycobiliproteins and RuBisCO, were used to determine protein concentration by Pierce™ BCA  
466 Protein Assay Kit and to measure RuBisCO activity by employing an assay adapted from Kubien  
467 et al. (2011). The assay buffer (100 mM HEPES, 25 mM MgCl<sub>2</sub>, 1 mM EDTA, pH 7.6) was used  
468 considering the high Michaelis constant for CO<sub>2</sub> (K<sub>c</sub>) for cyanobacterial RuBisCO. 20 µL of cell

469 lysates were preincubated in the assay mix (with 5 mM NaHCO<sub>3</sub>) at 25 °C for activation before  
470 initiating the reaction by adding synthesized ribulose 1,5-bisphosphate (RuBP) according to Kane  
471 et al. (Kane, Wilkin, Portis, & John Andrews, 1998). The absorbance at 340 nm was monitored  
472 using the Synergy H1 plate reader (BioTek). RuBisCO activity was reported as RuBP consumption  
473 rate normalized to total soluble protein content. The assay was performed for three biological  
474 replicates.

475

#### 476 **Cyanobacterial growth measurements**

477 OD<sub>750</sub> values were plotted as a function of time and analyzed in R with the Growthcurver package.  
478 Growth curve data was fitted to the standard form of the logistic equation to calculate growth  
479 parameters including growth rate, doubling time, and carrying capacity (Sprouffske & Wagner,  
480 2016). Each strain was grown in triplicate for every condition.

481

#### 482 **Photosynthetic oxygen evolution rate**

483 *S. elongatus* strain photosynthetic activity was assayed using a Clark-type oxygen electrode  
484 chamber to measure the level of molecular oxygen produced in cyanobacterial cultures. Cells were  
485 grown in 50 mL of BG-11 at 30 °C, illumination of 80 μmol photon·m<sup>-2</sup>·s<sup>-1</sup>, shaking at 120 rpm,  
486 in ambient air, and with culture sparging. The samples were collected from triplicate cultures  
487 during the exponential growth phase, pelleted by centrifugation at 4,700 × g for 10 min at room  
488 temperature, and resuspended in fresh BG-11 to an OD<sub>750</sub> of ~1.0. Concentration of chlorophyll *a*  
489 (for normalization) was measured following the protocol by Zavrel et al. (Zavrel et al., 2015). The  
490 remaining suspension was incubated in the dark for 20 min with gentle agitation. Samples from  
491 each suspension, prepared in three technical replicates, were analyzed in an oxygen electrode

492 chamber under saturated light, using the Oxygraph+ System (Hansatech Instruments) equipped  
493 with the OxyTrace+ software. Oxygen evolution rate was monitored for 10 min and expressed as  
494 nanomoles of molecular oxygen evolved per hour per microgram of chlorophyll *a*.

495

#### 496 **Carbon isotope fractionation in bulk cyanobacterial biomass**

497 The bacteria were pelleted by centrifugation at  $4,700 \times g$  for 10 min at room temperature, washed  
498 in 10 mL of 10 mM NaCl. The bacteria were resuspended in 1 mL of 10 mM NaCl and transferred  
499 to Eppendorf tubes. After centrifugation at  $4,700 \times g$  for 10 min at room temperature, the  
500 supernatants were completely removed, the pellets were dried in opened tubes in a laboratory oven  
501 at 50 °C for 2 days, and the resultant dried biomass samples were transferred into tin capsules.

502

503 The carbon isotope composition of bulk biomass ( $\delta^{13}C_{\text{biomass}}$ ) samples was determined at the UC  
504 Davis Stable Isotope Facility.  $\delta^{13}C_{\text{biomass}}$  was analyzed using a PDZ Europa ANCA-GSL elemental  
505 analyzer interfaced to a PDZ Europa 20-20 isotope ratio mass spectrometer (Sercon Ltd.). The  
506 carbon isotopic composition values were reported relative to the Vienna PeeDee Belemnite  
507 standard (V-PDB):

$$508 \quad \delta^{13}C_{\text{sample}} = \left( \frac{{}^{13}C / {}^{12}C_{\text{sample}}}{{}^{13}C / {}^{12}C_{V-PDB}} - 1 \right) \times 1000$$

509 The carbon isotope fractionation associated with photosynthetic CO<sub>2</sub> fixation ( $\epsilon_p$ ) was calculated  
510 relative to a reference  $\delta^{13}C_{\text{CO}_2}$  value (-8.4‰; (Keeling et al., 2017)) according to Freeman and  
511 Hayes (1992):

$$512 \quad \epsilon_p = \frac{\delta^{13}C_{\text{CO}_2} - \delta^{13}C_{\text{biomass}}}{1 + \delta^{13}C_{\text{biomass}} / 1000}$$

513

514

515 **Statistical analyses**

516 Results for experimental analyses were presented as the mean and the sample standard deviation  
517 (SD) values of at least three independent experiments. Statistical significance was analyzed with  
518 the two-tailed *t*-test. The unpaired sample *t*-test assuming equal variances was used to compare the  
519 values obtained for different cyanobacterial strains and the paired sample *t*-test was used to  
520 compare the values for the same strain at different experimental conditions.

521



522 **REFERENCES**

- 523 Andersson, C. R., Tsinoremas, N. F., Shelton, J., Lebedeva, N. V., Yarrow, J., Min, H., &  
524 Golden, S. S. (2000). Application of bioluminescence to the study of circadian rhythms in  
525 cyanobacteria. *Methods Enzymol*, 305, 527-542.
- 526 Atsumi, S., Higashide, W., & Liao, J. C. (2009). Direct photosynthetic recycling of carbon  
527 dioxide to isobutyraldehyde. *Nat Biotechnol*, 27(12), 1177-1180. doi:10.1038/nbt.1586
- 528 Bar-On, Y. M., & Milo, R. (2019). The global mass and average rate of rubisco. *Proc Natl Acad*  
529 *Sci USA*, 10, 4738-4743. doi:10.1073/pnas.1816654116
- 530 Bidigare, R. R., Fluegge, A., Freeman, K. H., Hanson, K. L., Hayes, J. M., Hollander, D., . . .  
531 Wakeham, S. G. (1997). Consistent fractionation of <sup>13</sup>C in nature and in the laboratory:  
532 growth-rate effects in some haptophyte algae. *Global Biogeochem Cycles*, 11(2), 279-  
533 292. doi:10.1029/96gb03939
- 534 Boller, A. J., Thomas, P. J., Cavanaugh, C. M., & Scott, K. M. (2011). Low stable carbon isotope  
535 fractionation by coccolithophore RubisCO. *Geochimica et Cosmochimica Acta*, 75(22),  
536 7200-7207. doi:10.1016/j.gca.2011.08.031
- 537 Bonfil, D. J., Ronen-Tarazi, M., Sultemeyer, D., Lieman-Hurwitz, J., Schatz, D., & Kaplan, A.  
538 (1998). A putative HCO<sub>3</sub><sup>-</sup> transporter in the cyanobacterium *Synechococcus* sp. strain  
539 PCC 7942. *FEBS Lett*, 430(3), 236-240.
- 540 Catling, D. C., & Zahnle, K. J. (2020). The Archean atmosphere. *Science Advances*, 6(9).  
541 doi:10.1126/sciadv.aax1420
- 542 Clerico, E. M., Ditty, J. L., & Golden, S. S. (2007). Specialized techniques for site-directed  
543 mutagenesis in cyanobacteria. *Methods Mol Biol*, 362, 155-171. doi:10.1007/978-1-  
544 59745-257-1\_11

- 545 De Porcellinis, A. J., Norgaard, H., Brey, L. M. F., Erstad, S. M., Jones, P. R., Heazlewood, J. L.,  
546 & Sakuragi, Y. (2018). Overexpression of bifunctional fructose-1,6-  
547 bisphosphatase/sedoheptulose-1,7-bisphosphatase leads to enhanced photosynthesis and  
548 global reprogramming of carbon metabolism in *Synechococcus* sp. PCC 7002. *Metab*  
549 *Eng*, 47, 170-183. doi:10.1016/j.ymben.2018.03.001
- 550 Deleens, E., Treichel, I., & O'Leary, M. H. (1985). Temperature dependence of carbon isotope  
551 fractionation in CAM plants. *Plant Physiology*, 79(1), 202-206. doi:10.1104/pp.79.1.202
- 552 Des Marais, D. J. (2001). Isotopic evolution of the biogeochemical carbon cycle during the  
553 Precambrian. *Reviews in Mineralogy and Geochemistry*, 43(1), 555-578.  
554 doi:10.2138/gsrmg.43.1.555
- 555 Eichner, M., Thoms, S., Kranz, S. A., & Rost, B. (2015). Cellular inorganic carbon fluxes in  
556 *Trichodesmium*: a combined approach using measurements and modelling. *J Exp Bot*,  
557 66(3), 749-759. doi:10.1093/jxb/eru427
- 558 Ellis, R. J. (1979). The most abundant protein in the world. *Trends in Biochemical Sciences*,  
559 4(11), 241-244.
- 560 Erb, T. J., & Zarzycki, J. (2018). A short history of RubisCO: the rise and fall (?) of Nature's  
561 predominant CO<sub>2</sub> fixing enzyme. *Curr Opin Biotechnol*, 49, 100-107.  
562 doi:10.1016/j.copbio.2017.07.017
- 563 Eungrasamee, K., Miao, R., Incharoensakdi, A., Lindblad, P., & Jantaro, S. (2019). Improved  
564 lipid production via fatty acid biosynthesis and free fatty acid recycling in engineered  
565 *Synechocystis* sp. PCC 6803. *Biotechnology for biofuels*, 12, 8-8. doi:10.1186/s13068-  
566 018-1349-8

- 567 Falkowski, P. G., Fenchel, T., & Delong, E. F. (2008). The microbial engines that drive Earth's  
568 biogeochemical cycles. *Science*, *320*(5879), 1034-1039. doi:10.1126/science.1153213
- 569 Field, C. B. (1998). Primary Production of the Biosphere: Integrating Terrestrial and Oceanic  
570 Components. *Science*, *281*(5374), 237-240. doi:10.1126/science.281.5374.237
- 571 Freeman, K. H., & Hayes, J. M. (1992). Fractionation of carbon isotopes by phytoplankton and  
572 estimates of ancient CO<sub>2</sub> levels. *Global Biogeochemical Cycles*, *6*(2), 185-198.  
573 doi:10.1029/92gb00190
- 574 Gabay, C., Lieman-Hurwitz, J., Hassidim, M., Ronen-Tarazi, M., & Kaplan, A. (1998).  
575 Modification of topA in *Synechococcus* sp. PCC 7942 resulted in mutants capable of  
576 growing under low but not high concentration of CO<sub>2</sub>. *FEMS Microbiology Letters*,  
577 *159*(2), 343-347. doi:10.1111/j.1574-6968.1998.tb12881.x
- 578 Garcia, A. K., Cavanaugh, C. M., & Kacar, B. (2021). The curious consistency of carbon  
579 biosignatures over billions of years of Earth-life coevolution. *ISME J*.  
580 doi:10.1038/s41396-021-00971-5
- 581 Gesch, R. W., Kang, I. H., Gallo-Meagher, M., Vu, J. C. V., Boote, K. J., H. Allen, L., & Bowes,  
582 G. (2003). Rubisco expression in rice leaves is related to genotypic variation of  
583 photosynthesis under elevated growth CO<sub>2</sub> and temperature. *Plant, Cell & Environment*,  
584 *26*(12), 1941-1950. doi:10.1046/j.1365-3040.2003.01110.x
- 585 Guy, H. I., & Evans, D. R. (1996). Function of the major synthetase subdomains of carbamyl-  
586 phosphate synthetase. *J Biol Chem*, *271*(23), 13762-13769. doi:10.1074/jbc.271.23.13762
- 587 Guy, R. D., Fogel, M. L., & Berry, J. A. (1993). Photosynthetic fractionation of the stable  
588 isotopes of oxygen and carbon. *Plant Physiol*, *101*(1), 37-47. doi:10.1104/pp.101.1.37

- 589 Hamilton, T. L., Bryant, D. A., & Macalady, J. L. (2016). The role of biology in planetary  
590 evolution: cyanobacterial primary production in low-oxygen Proterozoic oceans.  
591 *Environmental Microbiology*, *18*(2), 325-340. doi:10.1111/1462-2920.13118
- 592 Havig, J. R., Hamilton, T. L., Bachan, A., & Kump, L. R. (2017). Sulfur and carbon isotopic  
593 evidence for metabolic pathway evolution and a four-stepped Earth system progression  
594 across the Archean and Paleoproterozoic. *Earth-Science Reviews*, *174*, 1-21.  
595 doi:10.1016/j.earscirev.2017.06.014
- 596 Hayer-Hartl, M. (2017). From chaperonins to Rubisco assembly and metabolic repair. *Protein*  
597 *Science*, *26*(12), 2324-2333. doi:10.1002/pro.3309
- 598 Hayes, J. M. (1993). Factors controlling <sup>13</sup>C contents of sedimentary organic compounds:  
599 Principles and evidence. *Marine Geology*, *113*(1-2), 111-125. doi:10.1016/0025-  
600 3227(93)90153-m
- 601 Hinga, K. R., Arthur, M. A., Pilson, M. E. Q., & Whitaker, D. (1994). Carbon isotope  
602 fractionation by marine phytoplankton in culture: the effects of CO<sub>2</sub> concentration, pH,  
603 temperature, and species. *Global Biogeochemical Cycles*, *8*(1), 91-102.  
604 doi:10.1029/93gb03393
- 605 Hood, R. D., Higgins, S. A., Flamholz, A., Nichols, R. J., & Savage, D. F. (2016). The stringent  
606 response regulates adaptation to darkness in the cyanobacterium *Synechococcus*  
607 *elongatus*. *Proc Natl Acad Sci U S A*, *113*(33), E4867-4876.  
608 doi:10.1073/pnas.1524915113
- 609 Hurley, S. J., Wing, B. A., Jasper, C. E., Hill, N. C., & Cameron, J. C. (2021). Carbon isotope  
610 evidence for the global physiology of Proterozoic cyanobacteria. *Science Advances*, *7*(2).  
611 doi:10.1126/sciadv.abc8998

- 612 Iwaki, T., Haranoh, K., Inoue, N., Kojima, K., Satoh, R., Nishino, T., . . . Wadano, A. (2006).  
613 Expression of foreign type I ribulose-1,5-bisphosphate carboxylase/ oxygenase (EC  
614 4.1.1.39) stimulates photosynthesis in cyanobacterium *Synechococcus* PCC7942 cells.  
615 *Photosynth Res*, 88(3), 287-297. doi:10.1007/s11120-006-9048-x
- 616 Kacar, B., Hanson-Smith, V., Adam, Z. R., & Boekelheide, N. (2017). Constraining the timing  
617 of the Great Oxidation Event within the Rubisco phylogenetic tree. *Geobiology*, 15(5),  
618 628-640. doi:10.1111/gbi.12243
- 619 Kane, H. J., Wilkin, J.-M., Portis, A. R., & John Andrews, T. (1998). Potent Inhibition of  
620 Ribulose-Bisphosphate Carboxylase by an Oxidized Impurity in Ribulose-1,5-  
621 Bisphosphate. *Plant Physiology*, 117(3), 1059-1069. doi:10.1104/pp.117.3.1059
- 622 Kanno, M., Carroll, A. L., & Atsumi, S. (2017). Global metabolic rewiring for improved CO<sub>2</sub>  
623 fixation and chemical production in cyanobacteria. *Nature Communications*, 8(1), 14724.  
624 doi:10.1038/ncomms14724
- 625 Keeling, R. F., Graven, H. D., Welp, L. R., Resplandy, L., Bi, J., Piper, S. C., . . . Meijer, H. A. J.  
626 (2017). Atmospheric evidence for a global secular increase in carbon isotopic  
627 discrimination of land photosynthesis. *Proc Natl Acad Sci U S A*, 114(39), 10361-10366.  
628 doi:10.1073/pnas.1619240114
- 629 Knoll, A.H., Bergmann, K.D. and Strauss, J.V., 2016. Life: the first two billion  
630 years. *Philosophical Transactions of the Royal Society B: Biological Sciences*, 371(1707),  
631 p.20150493.
- 632 Krissansen-Totton, J., Buick, R., & Catling, D. C. (2015). A statistical analysis of the carbon  
633 isotope record from the Archean to Phanerozoic and implications for the rise of oxygen.  
634 *American Journal of Science*, 315(4), 275-316. doi:10.2475/04.2015.01

- 635 Kuan, D., Duff, S., Posarac, D., & Bi, X. (2015). Growth optimization of *Synechococcus*  
636 *elongatus* PCC7942 in lab flasks and a 2-D photobioreactor. *The Canadian Journal of*  
637 *Chemical Engineering*, 93(4), 640-647. doi:10.1002/cjce.22154
- 638 Kubien, D. S., Brown, C. M., & Kane, H. J. (2011). Quantifying the amount and activity of  
639 Rubisco in leaves. *Methods Mol Biol*, 684, 349-362. doi:10.1007/978-1-60761-925-3\_27
- 640 Laws, E. A., Bidigare, R. R., & Popp, B. N. (1997). Effect of growth rate and CO<sub>2</sub> concentration  
641 on carbon isotopic fractionation by the marine diatom *Phaeodactylum tricoratum*.  
642 *Limnology and Oceanography*, 42(7), 1552-1560. doi:10.4319/lo.1997.42.7.1552
- 643 Laws, E. A., Popp, B. N., Cassar, N., & Tanimoto, J. (2002). <sup>13</sup>C discrimination patterns in  
644 oceanic phytoplankton: likely influence of CO<sub>2</sub> concentrating mechanisms, and  
645 implications for palaeoreconstructions. *Functional Plant Biology*, 29(3).  
646 doi:10.1071/pp01183
- 647 Lechno-Yossef, S., Rohnke, B. A., Belza, A. C. O., Melnicki, M. R., Montgomery, B. L., &  
648 Kerfeld, C. A. (2020). Cyanobacterial carboxysomes contain an unique rubisco-activase-  
649 like protein. *New Phytologist*, 225(2), 793-806. doi:10.1111/nph.16195
- 650 Liang, F., & Lindblad, P. (2017). *Synechocystis* PCC 6803 overexpressing RuBisCO grow faster  
651 with increased photosynthesis. *Metab Eng Commun*, 4, 29-36.  
652 doi:10.1016/j.meteno.2017.02.002
- 653 Liu, C., Young, A. L., Starling-Windhof, A., Bracher, A., Saschenbrecker, S., Rao, B. V., . . .  
654 Hayer-Hartl, M. (2010). Coupled chaperone action in folding and assembly of  
655 hexadecameric Rubisco. *Nature*, 463(7278), 197-202. doi:10.1038/nature08651

- 656 Lloyd, M. K., McClelland, H. L. O., Antler, G., Bradley, A. S., Halevy, I., Junium, C. K., . . .  
657 Zerkle, A. L. (2020). The Isotopic Imprint of Life on an Evolving Planet. *Space Science*  
658 *Reviews*, 216(7). doi:10.1007/s11214-020-00730-6
- 659 Luo, X., Li, J., Chang, T., He, H., Zhao, Y., Yang, X., . . . Xu, Y. (2019). Stable Reference Gene  
660 Selection for RT-qPCR Analysis in *Synechococcus elongatus* PCC 7942 under Abiotic  
661 Stresses. *Biomed Res Int*, 2019, 7630601. doi:10.1155/2019/7630601
- 662 Lyons, T. W., Fike, D. A., & Zerkle, A. (2015). Emerging Biogeochemical Views of Earth's  
663 Ancient Microbial Worlds. *Elements*, 11(6), 415-421. doi:10.2113/gselements.11.6.415
- 664 Maeda, S., Price, G. D., Badger, M. R., Enomoto, C., & Omata, T. (2000). Bicarbonate binding  
665 activity of the CmpA protein of the cyanobacterium *Synechococcus* sp. strain PCC 7942  
666 involved in active transport of bicarbonate. *J Biol Chem*, 275(27), 20551-20555.  
667 doi:10.1074/jbc.M003034200
- 668 McNevin, D. B., Badger, M. R., Kane, H. J., & Farquhar, G. D. (2006). Measurement of (carbon)  
669 kinetic isotope effect by Rayleigh fractionation using membrane inlet mass spectrometry  
670 for CO<sub>2</sub>-consuming reactions. *Functional plant biology : FPB*, 33(12), 1115-1128.  
671 doi:10.1071/fp06201
- 672 Mizutani, H., & Wada, E. (1982). Effect of high atmospheric CO<sub>2</sub> concentration on  $\delta^{13}$  of algae.  
673 *Origins of life*, 12(4), 377-390. doi:10.1007/BF00927070
- 674 Nisbet, E. G., Grassineau, N. V., Howe, C. J., Abell, P. I., Regelous, M., & Nisbet, R. E. R.  
675 (2007). The age of Rubisco: the evolution of oxygenic photosynthesis. *Geobiology*, 5,  
676 311-335. doi:10.1111/j.1472-4669.2007.00127.x

- 677 Omata, T., Gohta, S., Takahashi, Y., Harano, Y., & Maeda, S. (2001). Involvement of a CbbR  
678 homolog in low CO<sub>2</sub>-induced activation of the bicarbonate transporter operon in  
679 cyanobacteria. *J Bacteriol*, *183*(6), 1891-1898. doi:10.1128/JB.183.6.1891-1898.2001
- 680 Onizuka, T., Akiyama, H., Endo, S., Kanai, S., Hirano, M., Tanaka, S., & Miyasaka, H. (2002).  
681 CO<sub>2</sub> Response Element and Corresponding trans-acting Factor of the Promoter for  
682 Ribulose-1,5-bisphosphate Carboxylase/oxygenase Genes in *Synechococcus* sp.  
683 PCC7002 Found by an Improved Electrophoretic Mobility Shift Assay. *Plant and Cell*  
684 *Physiology*, *43*(6), 660-667. doi:10.1093/pcp/pcf082
- 685 Poudel, S., Pike, D. H., Raanan, H., Mancini, J. A., Nanda, V., Rickaby, R. E. M., & Falkowski,  
686 P. G. (2020). Biophysical analysis of the structural evolution of substrate specificity in  
687 RuBisCO. *Proceedings of the National Academy of Sciences*, *117*(48), 30451-30457.  
688 doi:10.1073/pnas.2018939117
- 689 Price, G. D., Badger, M. R., Woodger, F. J., & Long, B. M. (2008). Advances in understanding  
690 the cyanobacterial CO<sub>2</sub>-concentrating-mechanism (CCM): functional components, Ci  
691 transporters, diversity, genetic regulation and prospects for engineering into plants. *J Exp*  
692 *Bot*, *59*(7), 1441-1461. doi:10.1093/jxb/erm112
- 693 Rau, G. H., Riebesell, U., & Wolf-Gladrow, D. (1996). A model of photosynthetic <sup>13</sup>C  
694 fractionation by marine phytoplankton based on diffusive molecular CO<sub>2</sub> uptake. *Marine*  
695 *Ecology Progress Series*, *133*(1/3), 275-285.
- 696 Raven, J. A. (2013). Rubisco: still the most abundant protein of Earth? *New Phytologist*, *198*(1),  
697 1-3. doi:10.1111/nph.12197



- 698 Raven, J. A., Cockell, C. S., & De La Rocha, C. L. (2008). The evolution of inorganic carbon  
699 concentrating mechanisms in photosynthesis. *Philosophical Transactions of the Royal*  
700 *Society B: Biological Sciences*, 363(1504), 2641-2650. doi:doi:10.1098/rstb.2008.0020
- 701 Riebesell, U., Revill, A. T., Holdsworth, D. G., & Volkman, J. K. (2000). The effects of varying  
702 CO<sub>2</sub> concentration on lipid composition and carbon isotope fractionation in *Emiliania*  
703 *huxleyi*. *Geochimica et Cosmochimica Acta*, 64(24), 4179-4192. doi:10.1016/s0016-  
704 7037(00)00474-9
- 705 Rillema, R., MacCready, J. S., & Vecchiarelli, A. G. (2020). Cyanobacterial growth and  
706 morphology are influenced by carboxysome positioning and temperature.  
707 doi:10.1101/2020.06.01.127845
- 708 Rippka, R., Deruelles, J., Waterbury, J. B., Herdman, M., & Stanier, R. Y. (1979). Generic  
709 Assignments, Strain Histories and Properties of Pure Cultures of Cyanobacteria.  
710 *Microbiology*, 111(1), 1-61. doi:<https://doi.org/10.1099/00221287-111-1-1>
- 711 Robinson, J. J., Scott, K. M., Swanson, S. T., O'Leary, M. H., Horken, K., Tabita, F. R., &  
712 Cavanaugh, C. M. (2003). Kinetic isotope effect and characterization of form II RubisCO  
713 from the chemoautotrophic endosymbionts of the hydrothermal vent tubeworm *Riftia*  
714 *pachyptila*. *Limnology and Oceanography*, 1, 48-54. doi:10.4319/lo.2003.48.1.0048
- 715 Roeske, C. A., & O'Leary, M. H. (1984). Carbon isotope effects on the enzyme-catalysed  
716 carboxylation of ribulose bisphosphate. *Biochemistry*, 23, 6275-6284.
- 717 Rothschild, L. J., & DesMarais, D. (1989). Stable carbon isotope fractionation in the search for  
718 life on early Mars. *Adv Space Res*, 9(6), 159-165.
- 719 Schidlowski, M. (1988). A 3,800-Million-Year Isotopic Record of Life from Carbon in  
720 Sedimentary-Rocks. *Nature*, 333(6171), 313-318. doi:DOI 10.1038/333313a0

- 721 Schidlowski, M. (2001). Carbon isotopes as biogeochemical recorders of life over 3.8 Ga of  
722 Earth history: evolution of a concept. *Precambrian Research*, 106(1-2), 117-134. doi:Doi  
723 10.1016/S0301-9268(00)00128-5
- 724 Schirrmeister, B. E., Sanchez-Baracaldo, P., & Wacey, D. (2016). Cyanobacterial evolution  
725 during the Precambrian. *International Journal of Astrobiology*, 15(3), 187-204.  
726 doi:10.1017/s1473550415000579
- 727 Schopf, J. W. (2011). The paleobiological record of photosynthesis. *Photosynth Res*, 107(1), 87-  
728 101. doi:10.1007/s11120-010-9577-1
- 729 Schubert, B. A., & Jahren, A. H. (2012). The effect of atmospheric CO<sub>2</sub> concentration on carbon  
730 isotope fractionation in C<sub>3</sub> land plants. *Geochimica et Cosmochimica Acta*, 96, 29-43.  
731 doi:10.1016/j.gca.2012.08.003
- 732 Scott, K. M., Henn-Sax, M., Harmer, T. L., Longo, D. L., Frame, C. H., & Cavanaugh, C. M.  
733 (2007). Kinetic isotope effect and biochemical characterization of form IA RubisCO from  
734 the marine cyanobacterium *Prochlorococcus marinus* MIT9313. *Limnology and*  
735 *Oceanography*, 52(5), 2199-2204.
- 736 Sengupta, A., Sunder, A. V., Sohoni, S. V., & Wangikar, P. P. (2019). Fine-Tuning Native  
737 Promoters of *Synechococcus elongatus* PCC 7942 To Develop a Synthetic Toolbox for  
738 Heterologous Protein Expression. *ACS Synth Biol*, 8(5), 1219-1223.  
739 doi:10.1021/acssynbio.9b00066
- 740 Sprouffske, K., & Wagner, A. (2016). Growthcurver: an R package for obtaining interpretable  
741 metrics from microbial growth curves. *BMC Bioinformatics*, 17, 172.  
742 doi:10.1186/s12859-016-1016-7

- 743 Szekeres, E., Sicora, C., Dragoş, N., & Drugă, B. (2014). Selection of proper reference genes for  
744 the cyanobacterium *Synechococcus* PCC 7002 using real-time quantitative PCR. *FEMS*  
745 *Microbiol Lett*, *359*(1), 102-109. doi:10.1111/1574-6968.12574
- 746 Taton, A., Erikson, C., Yang, Y., Rubin, B. E., Rifkin, S. A., Golden, J. W., & Golden, S. S.  
747 (2020). The circadian clock and darkness control natural competence in cyanobacteria.  
748 *Nat Commun*, *11*(1), 1688. doi:10.1038/s41467-020-15384-9
- 749 Taton, A., Unglaub, F., Wright, N. E., Zeng, W. Y., Paz-Yepes, J., Brahamsha, B., . . . Golden, J.  
750 W. (2014). Broad-host-range vector system for synthetic biology and biotechnology in  
751 cyanobacteria. *Nucleic Acids Research*, *42*(17), e136-e136. doi:10.1093/nar/gku673
- 752 Tcherkez, G. G., Farquhar, G. D., & Andrews, T. J. (2006). Despite slow catalysis and confused  
753 substrate specificity, all ribulose biphosphate carboxylases may be nearly perfectly  
754 optimized. *Proc Natl Acad Sci U S A*, *103*(19), 7246-7251. doi:10.1073/pnas.0600605103
- 755 Tchernov, D., Helman, Y., Keren, N., Luz, B., Ohad, I., Reinhold, L., . . . Kaplan, A. (2001).  
756 Passive entry of CO<sub>2</sub> and its energy-dependent intracellular conversion to HCO<sub>3</sub><sup>-</sup> in  
757 cyanobacteria are driven by a photosystem I-generated delta muH<sup>+</sup>. *J Biol Chem*, *276*(26),  
758 23450-23455. doi:10.1074/jbc.M101973200
- 759 Thomas, P. J., Boller, A. J., Satagopan, S., Tabita, F. R., Cavanaugh, C. M., & Scott, K. M.  
760 (2019). Isotope discrimination by form IC RubisCO from *Ralstonia eutropha* and  
761 *Rhodobacter sphaeroides*, metabolically versatile members of 'Proteobacteria' from  
762 aquatic and soil habitats. *Environ Microbiol*, *21*(1), 72-80. doi:10.1111/1462-2920.14423
- 763 Ungerer, J., Lin, P.-C., Chen, H.-Y., & Pakrasi, H. B. (2018). Adjustments to Photosystem  
764 Stoichiometry and Electron Transfer Proteins Are Key to the Remarkably Fast Growth of

- 765 the Cyanobacterium *Synechococcus elongatus* UTEX 2973. *mBio*, 9(1),  
766 e02327-02317. doi:10.1128/mBio.02327-17
- 767 Vijayan, V., Jain, I. H., & O'Shea, E. K. (2011). A high resolution map of a cyanobacterial  
768 transcriptome. *Genome Biology*, 12(5), R47. doi:10.1186/gb-2011-12-5-r47
- 769 Vijayan, V., Jain, I. H., & O'Shea, E. K. (2011). A high resolution map of a cyanobacterial  
770 transcriptome. *Genome Biol*, 12(5), R47. doi:10.1186/gb-2011-12-5-r47
- 771 von Caemmerer, S., Tazoe, Y., Evans, J. R., & Whitney, S. M. (2014). Exploiting  
772 transplastomically modified Rubisco to rapidly measure natural diversity in its carbon  
773 isotope discrimination using tuneable diode laser spectroscopy. *J Exp Bot*, 65(13), 3759-  
774 3767. doi:10.1093/jxb/eru036
- 775 Wang, S., Yeager, K. M., & Lu, W. (2016). Carbon isotope fractionation in phytoplankton as a  
776 potential proxy for pH rather than for [CO<sub>2</sub>(aq)]: Observations from a carbonate lake.  
777 *Limnology and Oceanography*, 61(4), 1259-1270. doi:10.1002/lno.10289
- 778 Wilkes, E. B., Lee, R. B. Y., McClelland, H. L. O., Rickaby, R. E. M., & Pearson, A. (2018).  
779 Carbon isotope ratios of coccolith-associated polysaccharides of *Emiliania huxleyi* as a  
780 function of growth rate and CO<sub>2</sub> concentration. *Organic Geochemistry*, 119, 1-10.  
781 doi:10.1016/j.orggeochem.2018.02.006
- 782 Wong, W. W., & Sackett, W. M. (1978). Fractionation of stable carbon isotopes by marine  
783 phytoplankton. *Geochimica et Cosmochimica Acta*, 42(12), 1809-1815.  
784 doi:10.1016/0016-7037(78)90236-3
- 785 Yoshioka, T. (1997). Phytoplanktonic carbon isotope fractionation: equations accounting for  
786 CO<sub>2</sub>-concentrating mechanisms. *Journal of Plankton Research*, 19(10), 1455-1476.  
787 doi:10.1093/plankt/19.10.1455

788 Yu, J., Liberton, M., Cliften, P. F., Head, R. D., Jacobs, J. M., Smith, R. D., . . . Pakrasi, H. B.  
789 (2015). *Synechococcus elongatus* UTEX 2973, a fast growing cyanobacterial chassis for  
790 biosynthesis using light and CO<sub>2</sub>. *Scientific Reports*, 5(1), 8132. doi:10.1038/srep08132  
791 Zavrel, T., Sinetova, M. A., & Červený, J. (2015). Measurement of Chlorophyll a and  
792 Carotenoids Concentration in Cyanobacteria. *Bio-protocol*, 5(9), e1467.  
793 doi:10.21769/BioProtoc.1467  
794

795 **TABLES**

796 **Table 1. Strains and plasmids used in this study.**

| Strain or plasmid | Description/Genotype                                                                                                                                                            | Antibiotic resistance | Source/Reference               |
|-------------------|---------------------------------------------------------------------------------------------------------------------------------------------------------------------------------|-----------------------|--------------------------------|
| WT                | Wild-type strain of <i>S. elongatus</i> PCC 7942                                                                                                                                | -                     | Susan S. Golden (UC San Diego) |
| pAM4937           | Expression vector for <i>S. elongatus</i> PCC 7942 neutral site 2 (NS2)                                                                                                         | Km                    | (Taton et al., 2014)           |
| pSyn02            | pAM4937 carrying the <i>rbc</i> operon including <i>rbcL</i> , <i>rbcS</i> , <i>purK</i> , and flanking sequences from <i>S. elongatus</i> PCC 7942 (CP000100: 1479071-1484283) | Km                    | This study                     |
| Syn02             | <i>S. elongatus</i> PCC 7942 carrying a second copy of the <i>rbc</i> operon and flanking sequences at NS2: NS2:: <i>aphI-rbcL-rbcS-purK</i> - Synpcc7942_1429-Synpcc7942_1430  | Km                    | This study                     |
| pAM4951           | Expression vector for <i>S. elongatus</i> PCC 7942 neutral site 1 (NS1)                                                                                                         | Sp+Sm                 | (Taton et al., 2014)           |
| pSyn01            | Plasmid to replace <i>S. elongatus</i> ' native <i>rbc</i> operon (CP000100: 1479070-                                                                                           | Sp+Sm                 | This study                     |

1482595) with a Sp/Sm resistance

gene:  $\Delta(rbcL-rbcS-purK)::aadA$ .

Syn01

*S. elongatus* strain Syn02 with the Km, This study

native *rbc* operon removed: Syn02 and Sp+Sm

and  $\Delta(rbcL-rbcS-purK)::aadA$ .

---

797

798

799

800 **Table 2. Growth parameters and oxygen evolution rates of *S. elongatus* strains under varying**  
 801 **CO<sub>2</sub> concentrations<sup>a</sup>.**

| Strain | Atmosphere         | Growth rate (h <sup>-1</sup> ) | Carrying    | Oxygen evolution rate                                                          |
|--------|--------------------|--------------------------------|-------------|--------------------------------------------------------------------------------|
|        |                    |                                | capacity    | nmol (O <sub>2</sub> ·h <sup>-1</sup> ·μg <sup>-1</sup> chlorophyll <i>a</i> ) |
| WT     | Air                | 0.017 ± 0.001                  | 6.79 ± 0.70 | 342 ± 26                                                                       |
|        | 2% CO <sub>2</sub> | 0.043 ± 0.002                  | 8.43 ± 0.53 | -                                                                              |
|        | 5% CO <sub>2</sub> | 0.047 ± 0.005                  | 5.35 ± 0.28 | -                                                                              |
| Syn02  | Air                | 0.020 ± 0.001*                 | 7.63 ± 0.54 | 362 ± 26                                                                       |
|        | 2% CO <sub>2</sub> | 0.046 ± 0.001                  | 8.28 ± 0.22 | -                                                                              |
|        | 5% CO <sub>2</sub> | 0.040 ± 0.001                  | 5.44 ± 0.36 | -                                                                              |

802 <sup>a</sup>Values are means of three biological replicates ± 1 SD. Asterisks indicate *t*-test result from  
 803 comparison with WT for the same atmospheric condition, \* – *p* < 0.05.

804



805 **FIGURES**

806

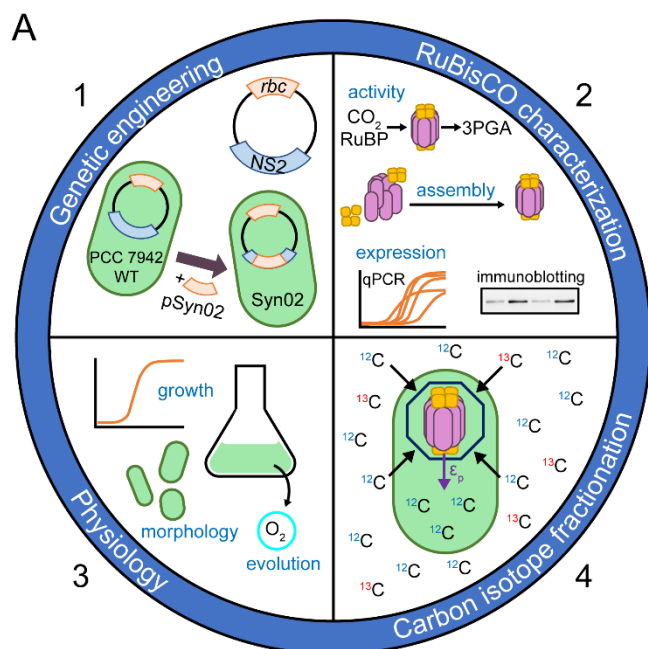

807 **B**

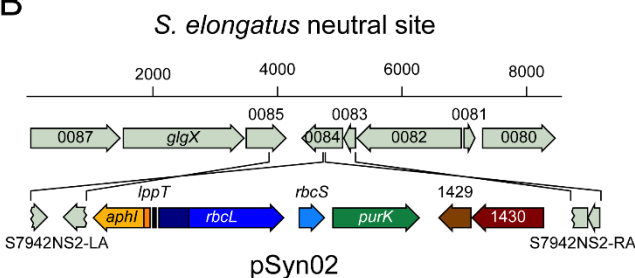

808

808 **Figure 1. Experimental strategy. A – Overall methodology. 1) Genetic engineering:** An

809 additional copy of the *rbc* operon was inserted at the chromosomal NS2 site of *S. elongatus* PCC

810 7942 to create the Syn02 strain. 2) RuBisCO characterization was carried out by investigating (a)

811 catalytic activity, (b) assembly into a hexadecameric complex, and (c) expression at both the

812 transcript and protein levels. 3) Physiology: *S. elongatus* WT and Syn02 strains were evaluated by

813 monitoring microbial growth characteristics, morphology, and rate of photosynthetic oxygen

814 evolution. 4) Carbon isotope fractionation: The impact of RuBisCO overexpression on biomass

815  $\delta^{13}\text{C}$  and  $\epsilon_p$  under varying  $\text{CO}_2$  concentrations was assessed. **B – Map of the genetic insert in *S.***

816 ***elongatus* strain Syn02.** Plasmid pSyn02 was used to insert the *rbc* operon and the *aphI* gene  
817 conferring kanamycin resistance in PCC 7942 WT NS2 to generate the Syn02 strain. Crosslines  
818 indicate homologous recombination sites and scale bars show DNA fragment sizes (in bp).

819

820

821

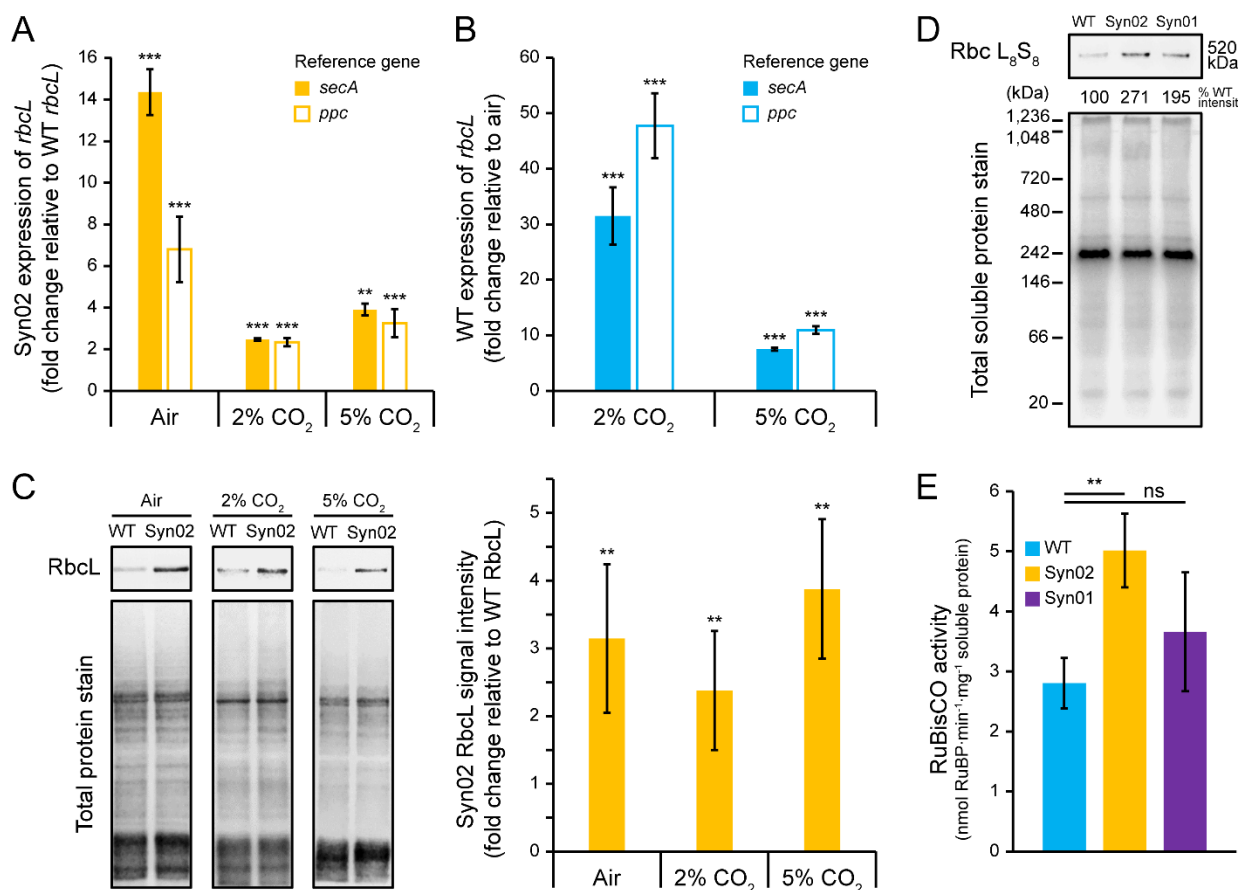

822

823 **Figure 2. RuBisCO expression, assembly, and activity in *S. elongatus* strains under varying**

824 **CO<sub>2</sub> concentrations. A – Expression of Syn02 *rbcL* relative to WT *rbcL*. Asterisks indicate *t*-**

825 **test results compared to WT *rbcL* expression at the same growth condition. B – Expression of**

826 **WT *rbcL* at 2-5% CO<sub>2</sub> relative to ambient air. Asterisks indicate *t*-test results compared to**

827 **WT *rbcL* expression in air. A-B – Expression data was measured by RT-qPCR, normalized to**

828 **reference genes *secA* and *ppc*. Columns represent mean fold expression for three biological**

829 **replicates. C – Immunodetection of RbcL. (left) Western blot showing RbcL protein detected**

830 **by anti-RuBisCO antibody and total protein stain from crude cell lysates. (right) RbcL**

831 **percentage signal intensities were normalized to that for the total soluble protein load. Columns**

832 **represent mean RbcL intensities for six biological replicates, relative to mean values for WT**

833 cultures at the same growth condition. Asterisks indicate *t*-test results compared to WT RbcL. **D**  
834 – **Immunodetection of assembled RuBisCO.** Western blot showing the proper assembly of  
835 RbcL and RbcS into the L<sub>8</sub>S<sub>8</sub> hexadecameric complex L<sub>8</sub>S<sub>8</sub> (520 kDa), detected by anti-RbcL  
836 antibody. Rbc L<sub>8</sub>S<sub>8</sub> percentage signal intensity was normalized to that for the total soluble  
837 protein load, and is shown relative to WT. **E – Lysate RuBisCO activity.** Activity was  
838 measured by the RuBP consumption rate, normalized to total soluble protein content of cell  
839 lysate. Columns represent the mean activity of three biological replicates. **A-C, E** – Asterisks  
840 indicate *t*-test results for pairwise comparison indicated by horizontal line. Error bars on all  
841 graphs indicate 1 SD. ns – not significant; \*\* –  $p < 0.01$ ; \*\*\* –  $p < 0.001$ .  
842

843

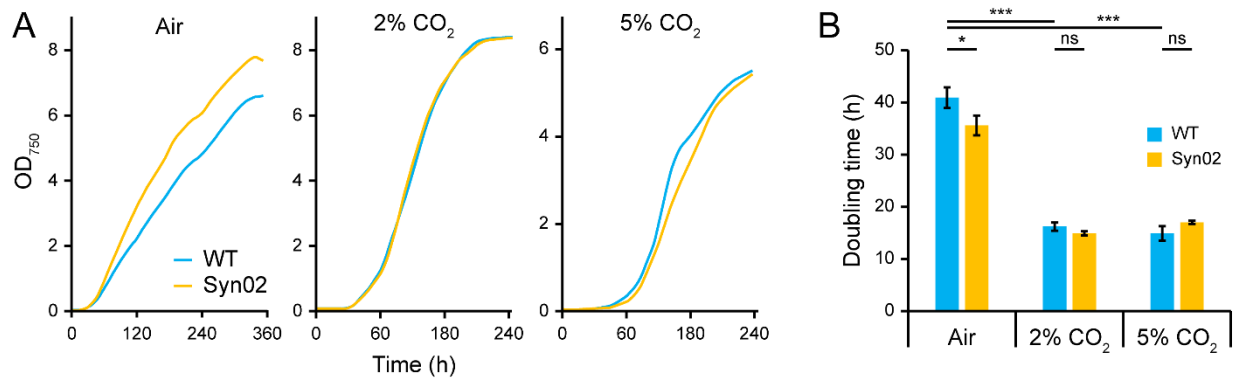

844

845 **Figure 3. Growth of *S. elongatus* strains. A – Growth profiles.** Cultures of each strain were  
846 maintained in ambient air or under 2% or 5% CO<sub>2</sub>. Smoothed profiles were generated from mean  
847 optical density (measured at 750 nm, OD<sub>750</sub>) values for three replicate cultures per growth  
848 condition. **B – Doubling times.** Columns represent the mean doubling time of three replicates.  
849 Error bars on all graphs indicate 1 SD, and asterisks indicate *t*-test results for pairwise comparisons  
850 indicated by horizontal lines. ns – not significant; \* –  $p < 0.05$ ; \*\*\* –  $p < 0.001$ .

851

852

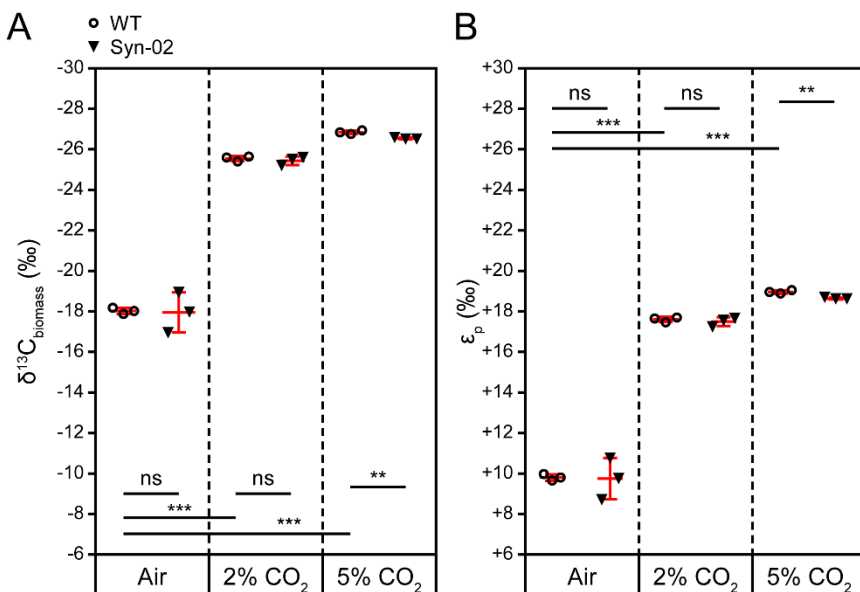

853

854 **Figure 4. <sup>13</sup>C/<sup>12</sup>C discrimination of *S. elongatus* strains under varying CO<sub>2</sub> concentrations. A**

855 – **Biomass  $\delta^{13}\text{C}$ .** Reported  $\delta^{13}\text{C}$  values are relative to the Vienna PeeDee Belemnite standard (V-

856 PDB). **B – <sup>13</sup>C/<sup>12</sup>C discrimination associated with photosynthetic CO<sub>2</sub> fixation ( $\epsilon_p$ ).**  $\epsilon_p$  values

857 are calculated relative to a reference value,  $\delta^{13}\text{C}_{\text{CO}_2} = -8.4\text{‰}$  (Keeling et al., 2017) (see **Materials**

858 **and Methods** for calculation). **A-B** – Mean (middle horizontal bars) and 1 SD (vertical error bars)

859 are shown in red. Asterisks indicate *t*-test results for pairwise comparisons indicated by horizontal

860 lines. ns – not significant; \*\* –  $p < 0.01$ ; \*\*\* –  $p < 0.001$ .

861

862

863
